1 **Representational similarity scores of digits in the sensorimotor cortex are associated with**  
2 **behavioral performance**

3 **Gooijers, J.<sup>1,2</sup>, Chalavi, S.<sup>1,2</sup>, Roebroek, A.<sup>3</sup>, Kaas, A.<sup>3\*</sup>, Swinnen, S.P.<sup>1,2\*</sup>**

4 1. Movement Control and Neuroplasticity Research Group, Department of Movement Sciences, KU  
5 Leuven, Leuven, Belgium

6 2. LBI- KU Leuven Brain Institute, Leuven, Belgium

7 3. Department of Cognitive Neuroscience, Faculty of Psychology & Neuroscience, Maastricht  
8 University, Maastricht, the Netherlands

9 \* shared senior authorship

10 **Corresponding author:**

11 Jolien Gooijers

12 Jolien.gooijers@kuleuven.be

13 KU Leuven

14

15 **Abstract**

16 Previous studies aimed to unravel a digit-specific somatotopic organization in the primary sensorimotor  
17 (SM1) cortex. It is, however, yet to be determined whether such digit somatotopy is associated with  
18 motor performance (i.e., effector selection) and digit enslaving (unintentional co-contraction of fingers)  
19 during different types of motor tasks. Here, we adopted multivariate representational similarity analysis,  
20 applied to high-field (7T) MRI data, to explore digit activation patterns in response to online finger  
21 tapping. Sixteen young adults (7 males, mean age: 24.4 years) underwent MRI, and additionally  
22 performed an offline choice reaction time task (CRTT) to assess effector selection. During both the  
23 finger tapping task (FTT) and the CRTT, force sensor data of all digits were acquired. This allowed us  
24 to assess digit enslaving (obtained from CRTT & FTT), as well as digit interference (i.e., erroneous  
25 effector selection; obtained from CRTT) and determine the correlation between these variables and digit  
26 representational similarity scores of SM1. Digit enslaving during finger tapping was associated with  
27 contralateral SM1 representational similarity scores of both hands. During the CRTT, digit enslaving of  
28 the right hand only was associated with representational similarity scores of left SM1. Additionally,  
29 right hand digit interference was associated with representational similarity scores of left S1. In  
30 conclusion, we demonstrate a cortical origin of digit enslaving, and uniquely reveal that effector  
31 selection performance is predicted by digit representations in the somatosensory cortex.

32

33 **Introduction**

34 To date, there is a vast amount of research supporting that inter-individual differences in brain structure  
35 and function are predictive of behavior. Concerning the control of uni- and bimanual movements,

36 previous studies applying neuroimaging techniques, have revealed the involvement of numerous cortical  
37 and cerebellar brain regions (for review see Bundy & Leuthardt, 2019; Chettouf, Rueda-Delgado, de  
38 Vries, Ritter, & Daffertshofer, 2020; Gooijers & Swinnen, 2014; Swinnen & Wenderoth, 2004). For  
39 example, it is generally accepted that hand, and by extension finger, movements elicit increased  
40 activation levels in the primary motor cortex (M1) at the level of the hand knob (Yousry et al., 1997).  
41 What remains under debate, however, is whether individual finger movements elicit detailed and  
42 specific activation patterns within this particular area. While there is consensus in the literature that such  
43 a topographical organization of individual digits exists at the level of the post-central primary  
44 somatosensory cortex (S1) (Kolasinski et al., 2016; Martuzzi, van der Zwaag, Farthouat, Gruetter, &  
45 Blanke, 2014; Sanchez-Panchuelo et al., 2012; Sanchez Panchuelo, Besle, Schluppeck, Humberstone,  
46 & Francis, 2018; Schellekens, Petridou, & Ramsey, 2018), evidence for such an organization in pre-  
47 central M1 is less explicit. Existing data point towards a) a fine-scale digit somatotopy (Schellekens et  
48 al., 2018; Siero et al., 2014) which shows a mirrored pattern of multiple digit representations along the  
49 lateral-medial axis at meso-scale (sub-millimeter) resolution (Huber et al., 2020), b) a partly somatotopic  
50 arrangement (Beisteiner et al., 2001; Hlustik, Solodkin, Gullapalli, Noll, & Small, 2001; Kleinschmidt,  
51 Nitschke, & Frahm, 1997; Lotze et al., 2000), c) a distributed organization with considerable overlap  
52 (Indovina & Sanes, 2001; Olman, Pickett, Schallmo, & Kimberley, 2012; Sanes, Donoghue, Thangaraj,  
53 Edelman, & Warach, 1995), and d) a complete lack of organization (Schieber, 2002). In sum, the  
54 findings on finger representations in M1 are mixed, with the majority reporting evidence of overlapping  
55 digit representations that only show a coarse somatotopy when differential contrasts between digits are  
56 performed. In order to take into account this distribution of cortical activation patterns of individual  
57 digits, a multivariate rather than a univariate approach is better suited to explore cortical representations  
58 of digits. Therefore, we investigated digit organization in M1 and S1 using representational similarity  
59 analysis (RSA), applied to functional MRI data acquired at high-field strength (7T).

60 To explore whether these patterns of digit activations at the cortical level are contingent upon everyday  
61 hand movements, work by Ejaz and colleagues (2015) revealed that digit representations in M1 are  
62 better predicted by natural hand use than by individual musculature. This points towards the fact that  
63 overlapping digit patterns at the central level are likely explained by fingers moving together in everyday  
64 life to produce natural movements. In addition, the authors reported a moderate negative association  
65 between multivariate pattern distances of digit representations in the sensorimotor cortex and digit  
66 enslaving (i.e., unintentional co-contraction of non-instructed fingers) when performing an individuated  
67 finger press at 75% of maximal voluntary contraction. That is, fingers evoking more similar spatial  
68 patterns of activation at the cortical level also showed more co-contraction at the digit level when  
69 performing an isometric force task.

70 Although these studies have significantly improved our insights into the cortical control of finger  
71 movements, to our knowledge, no study has attempted to associate digit representations in the

72 sensorimotor cortex with behavioral performance at the level of individual digits. Thus, it is yet to be  
73 determined whether cortical representations of individual digits in the sensorimotor cortex are associated  
74 with the ability to individually move (i.e., select) an instructed digit and simultaneously actively inhibit  
75 neighboring non-instructed digits. Since such tasks rely heavily on effector selection, and planning  
76 processes (Van Helvert, Oostwoud-Wijdenes, Geerligs, & Medendorp, 2021), engaging premotor,  
77 parietal as well as primary motor cortices (Ariani, Oosterhof, & Lingnau, 2018; Crammond & Kalaska,  
78 2000; Hirose, Nambu, & Naito, 2018; Tanji & Evarts, 1976), we aimed to investigate whether individual  
79 digit representations in M1 play a role in effector selection of the contralateral hand. To this end, we  
80 included a choice reaction time task (CRTT). Because recent evidence suggests that contralateral S1 is  
81 also involved in such movement preparation (Ariani, Pruszynski, & Diedrichsen, 2021; Gale, Flanagan,  
82 & Gallivan, 2021), we additionally assessed the importance of digit representations in S1 in effector  
83 selection of the contralateral hand. In addition, we determined the association between individual digit  
84 representations in the sensorimotor cortex and contralateral digit enslaving. Moving beyond the work  
85 by Ejaz and colleagues (2015) in which an isometric force task was used, we aimed to assess the cortical  
86 origin of digit enslaving during the performance of a time-pressured CRTT, predominantly dominated  
87 by planning processes, as well as during a simple, continuous finger tapping task (FTT), predominantly  
88 dominated by pure motor output processes.

89 We tested the hypothesis that individual digit activation patterns in contralateral M1, and to a lesser  
90 extent in contralateral S1, are significantly associated with CRTT performance (reflected as an  
91 interference score; i.e., the inability to inhibit movements of non-instructed fingers). More specifically,  
92 more overlapping digit activation patterns in the sensorimotor cortex are expected to positively correlate  
93 with higher interference scores of the contralateral hand. Additionally, we hypothesized that digit  
94 activation patterns in the sensorimotor cortex are associated with digit enslaving (reflected as co-  
95 activations of non-instructed fingers) during both the choice reaction time task and the simple,  
96 continuous finger tapping task. Finally, whereas previous work generally focused on one hand and one  
97 hemisphere, we compared the representational organization of individual digits in the sensorimotor  
98 cortex between hemispheres and between regions of interest (M1 and S1), with the expectation to find  
99 alike representations in the dominant and non-dominant hemisphere, and more similar activation  
100 patterns between digits in M1 relative to S1.

## 101 **Results**

102 As the main purpose of our work is to associate individual digit representations in the sensorimotor  
103 cortex with behavior at the level of individual digits, we first present the individual activation patterns  
104 and representational similarity scores. Next, we discuss the behavioral findings in relation to these  
105 representational similarity scores.

### 106 *Activity patterns and representational similarity scores*

107 Through analysis of high-resolution functional imaging data, we assessed digit activation patterns in the  
108 pre-central and post-central gyri. Figure 1 visualizes activation patterns in response to contralateral  
109 finger tapping movements in the left and right hemisphere in a representative participant.

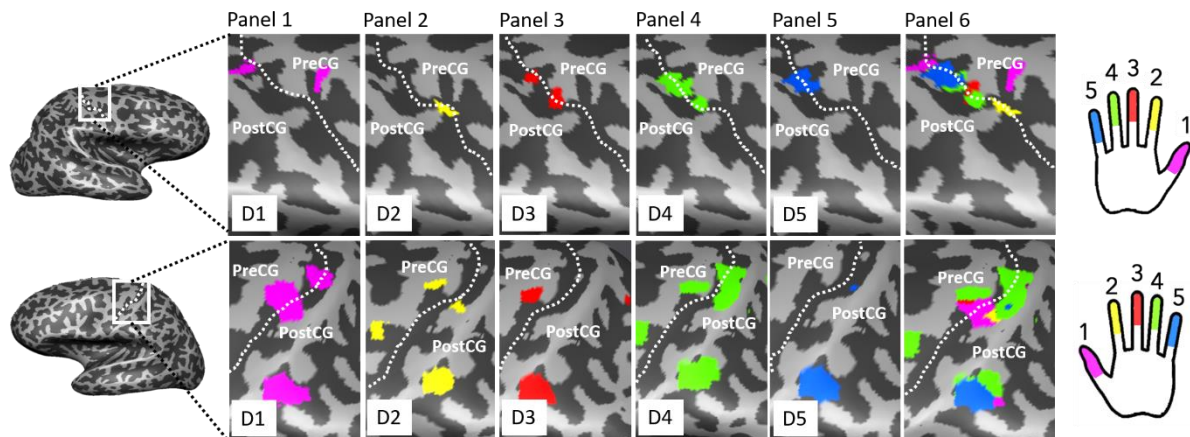

**Figure 1.** Evoked activation patterns in SM1 during continuous finger tapping with individual fingers for one representative subject. *Left:* Inflated 3D model of right (top) and left (bottom) hemisphere. White square indicates area of pre-central and post-central gyrus. The dotted line indicates the approximate location of the central sulcus. *Middle:* Surface maps for right hemisphere (top) and left hemisphere (bottom) are shown overlaid on the inflated 3D surface model. Panels 1 to 5 display individual digit activation patterns. Panel 6 displays an overlay of all digit activation patterns. The dotted line indicates the approximate location of the central sulcus. Dark grey are areas of negative curvature (sulci), light grey are areas of positive curvature (gyri). Activation patterns represent digit activations contrasted against baseline, with the following thresholds applied (min-max): right hemisphere (5.5-8.0), left hemisphere (3.0-8.0). PreCG = pre-central gyrus, PostCG = post-central gyrus. *Right:* a schematic drawing of the color-coded digits of the left (top) and right hand (bottom). Magenta = D1/thumb, Yellow = D2/index finger, Red = D3/middle finger, Green = D4/ring finger, Blue = D5/little finger.

110

111 **Effect of Region of Interest** As assessed by Mantel tests (5000 permutations), similarity  
112 matrices of M1 and S1, averaged across participants, were highly related within the left ( $r = .95, p =$   
113  $.008$ ) and within the right hemisphere ( $r = .98, p = .008$ ). That is, for both hemispheres, the between-  
114 digit spatial activation patterns (across all five digits) are highly correlated between M1 and S1. Mantel  
115 tests were also performed per participant (left hemisphere:  $r$  range:  $.67$  to  $.98$ ; significant ( $p < .05$ ) in 13  
116 out of 15 participants, right hemisphere:  $r$  range:  $.09$  to  $.94$ ; significant ( $p < .05$ ) in 14 out of 15  
117 participants). Corresponding correlation plots are presented in the upper panels of Figure 2. Moreover,  
118 Wilcoxon Matched Pairs Tests on vectorized correlation coefficients (i.e., vectors of correlation  
119 coefficients between digit pairs) revealed higher similarity scores for M1 relative to S1 in the right  
120 hemisphere for digit pairs D1-D2, D1-D4, D3-D4, D3-D5, D4-D5 ( $p_s < .005$ ), and in the left hemisphere  
121 for digit pair D3-D5 ( $p < .005$ ).

122 **Effect of Hemisphere** As assessed by Mantel tests (5000 permutations), representational  
123 structures of the left and right hemisphere, averaged across participants, were highly related for both M1  
124 ( $r = .99, p = .008$ ) and S1 ( $r = .98, p = .008$ ). Mantel tests were also performed per participant (M1:  $r$   
125 range:  $.09$  to  $.96$ ; significant ( $p < .05$ ) in 13 out of 15 participants. S1:  $r$  range:  $.12$  to  $.93$ ; significant ( $p$   
126  $< .05$ ) in 12 out of 15 participants). Corresponding correlation plots are presented in the lower panels of

127 Figure 2. Moreover, no hemispherical differences in vectorized correlation coefficients were found for  
128 M1 and S1, as assessed by non-parametric Wilcoxon Matched Pairs Tests (M1:  $p_s > .05$ ; S1:  $p_s > .05$ ).

129

130

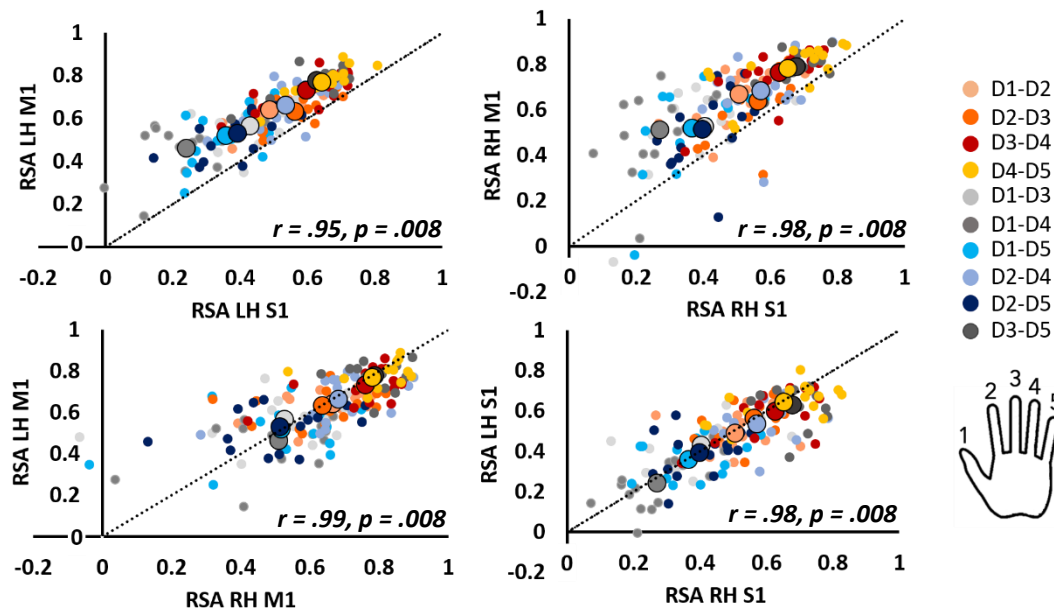

**Figure 2.** Correlation plots displaying association of RSA values between regions of interest for the left and right hemisphere separately (panels in top row) and between hemispheres for M1 and S1 separately (panels in bottom row). Cool colors refer to non-neighboring digit pairs; warm colors refer to neighboring digit pairs. The dotted line represents an identity line revealing higher RSA values for M1 relative to S1 within hemispheres, but no differences in RSA values between hemispheres within ROIs. Small dots represent individual data points; large dots represent the group average per digit pair. LH = left hemisphere, RH = right hemisphere, M1 = primary motor cortex, S1 = primary somatosensory cortex, RSA = representational similarity analyses.  $r$  and  $p$  values represent outcomes of the Mantel Tests across participants.

131

132 *Choice Reaction Time Task outside MR scanner – Digit interference and enslaving*

133 Because the digit interference and digit enslaving effects are of interest here, we only report results of  
134 these outcome measures. For findings on accuracy and reaction times, we refer the readers to the  
135 Supplementary Materials.

136 **Digit interference** With regard to vectorized median interference scores, non-parametric  
137 Sign Tests revealed no statistically significant difference between Coordination modes (uni- and  
138 bimanual;  $p = .61$ ), but revealed that median interference scores of the left hand were significantly higher  
139 relative to the right hand ( $p = .010$ ). In addition, a Friedman Test revealed a significant effect of Digit  
140 pair,  $X^2(9) = 95.17$ ,  $p < .001$ , with the highest interference scores reached for Digit pairs D1-D2, D2-  
141 D3, D3-D4, and D4-D5, i.e., the neighboring digits (see Figure 3). In addition, we applied Mantel tests  
142 to demonstrate that the interference structure in the left hand was significantly related to the interference

143 structure in the right hand (across participants,  $r = .67$ ,  $p = .042$ ;  $r$  range:  $-.33$  to  $.89$ ; significant ( $p <$   
 144  $.05$ ) in 3 out of 15 participants). The corresponding correlation plot is presented in Figure 4.

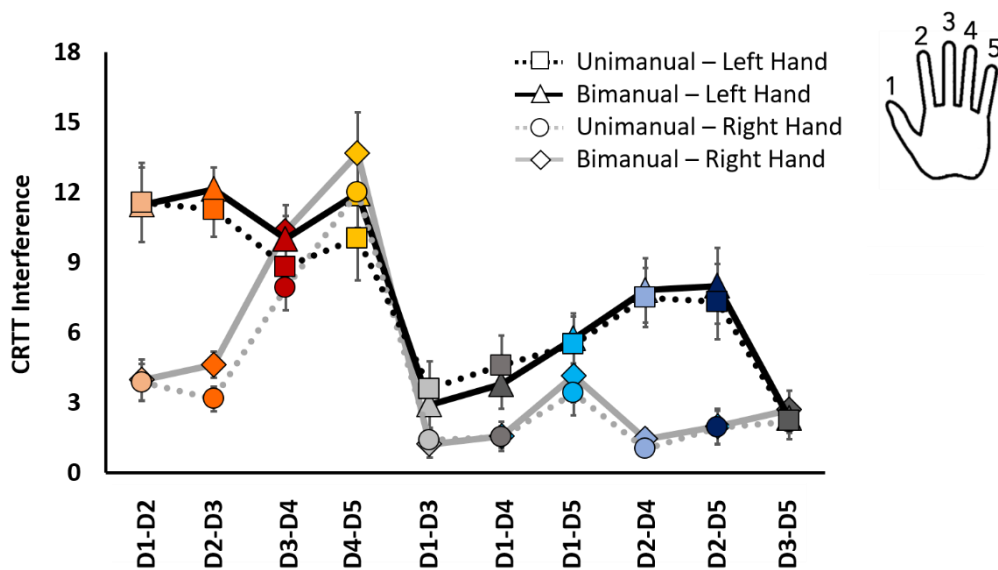

**Figure 3.** Digit interference scores during CRTT. Error bars indicate standard error of the mean. Cool colors refer to non-neighboring digit pairs; warm colors refer to neighboring digit pairs.

145

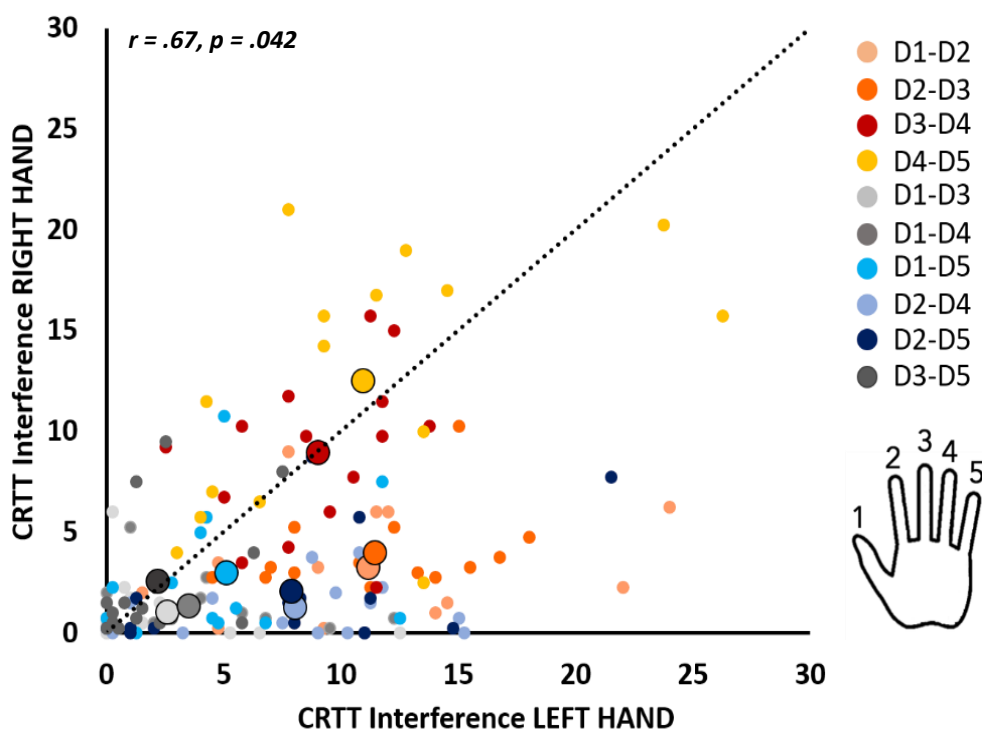

**Figure 4.** Correlation plot displaying association between CRTT interference scores of the left and right hand. Cool colors refer to non-neighboring digit pairs; warm colors refer to neighboring digit pairs. Small dots represent individual data points; large dots represent the group average per digit pair. The dotted line represents an identity line. With the large colored dots mainly located below the identity line, we demonstrate higher absolute interference scores for the left hand as compared to the right hand.  $r$  and  $p$  value represent outcome of the Mantel Test across participants.

146



147 **Digit enslaving** With respect to digit enslaving, non-parametric Sign Tests on  
148 vectorized digit pairs revealed no statistically significant differences between Coordination modes (uni-  
149 and bimanual;  $p = .61$ ), or between the left and right hand ( $p = .61$ ). However, a Friedman Test revealed  
150 a significant effect of Digit pair,  $X^2(9) = 85.36, p < .001$ , with the highest enslaving scores for digit pairs  
151 D3-D4, D3-D5 and D4-D5 (see Figure 5). In addition, we applied Mantel tests to demonstrate that the  
152 digit enslaving structure in the left hand was related to the digit enslaving structure in the right hand  
153 (across participants,  $r = .85, p = .008$ ;  $r$  range: .15 to .89; significant ( $p < .05$ ) in 6 out of 15 participants).  
154 The corresponding correlation plot is presented in Figure 6.

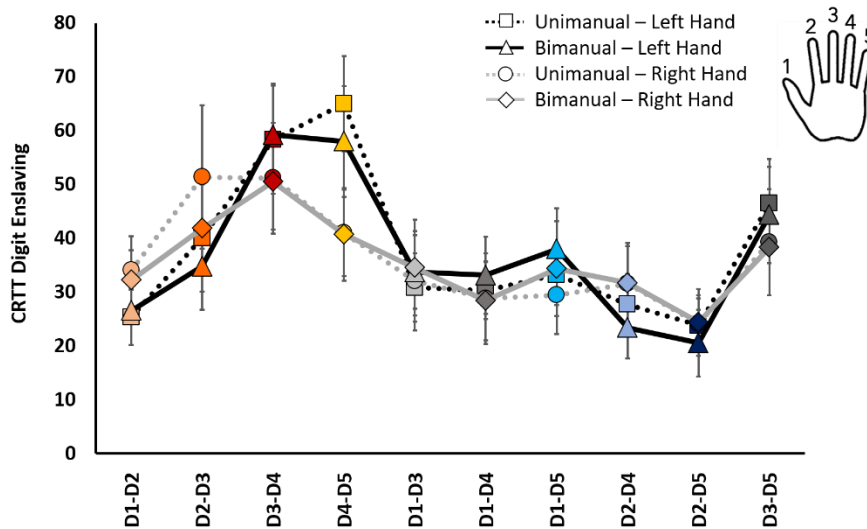

155 **Figure 5.** Digit enslaving during CRTT. Error bars indicate standard error of the mean. Cool colors refer to non-neighboring digit pairs; warm colors refer to neighboring digit pairs.

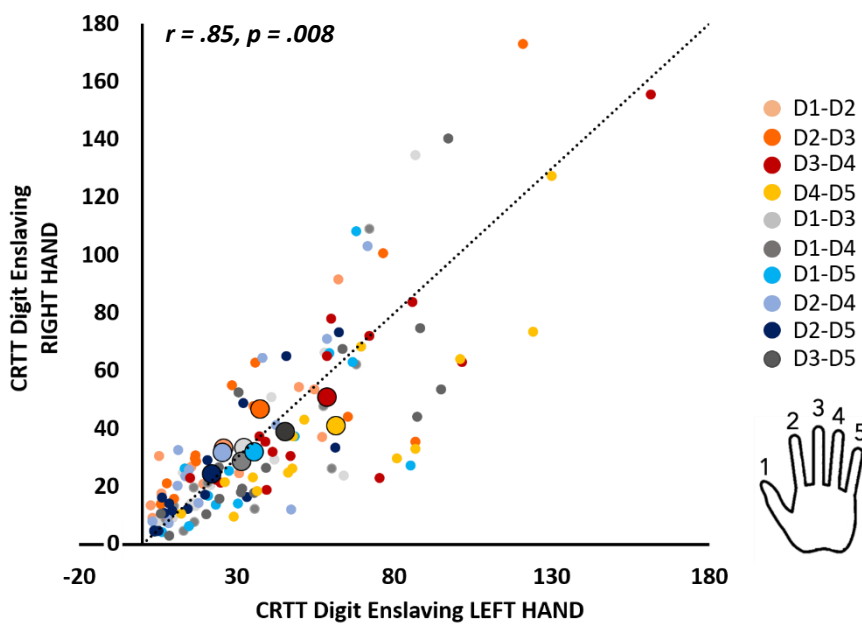

**Figure 6.** Correlation plot displaying association between digit enslaving of the left and right hand during CRTT. Cool colors refer to non-neighboring digit pairs; warm colors refer to neighboring digit pairs. The dotted line represents an identity line demonstrating no difference in digit enslaving between the two hands. Small dots represent individual data points; large dots represent the group average per digit pair.  $r$  and  $p$  value represent outcome of the Mantel Test across participants.

156 **Digit Interference and digit similarity scores** As there were no significant  
157 differences between interference scores of the uni- and bimanual Coordination modes, we averaged  
158 these values and arranged them in a symmetrized matrix for the left and right hand separately. To assess  
159 whether interference scores were associated with cortical digit representations, we correlated the CRTT  
160 interference matrix with the similarity matrix of the contralateral brain data. Mantel tests with 5000  
161 permutations, averaged across participants, revealed that cortical digit representations of left S1 were  
162 significantly correlated with the contralateral CRTT interference matrix;  $r = .59, p = .025$ . This finding  
163 indicates that higher similarity scores between activation patterns at the level of S1 (i.e., more overlap  
164 between digit representations), are related to more interference (i.e., decreased inhibition of non-cued  
165 digits). Other associations did not reach significance; left M1 – right hand:  $r = .44, p = .12$ ; right S1 –  
166 left hand:  $r = .20, p = .28$ ; right M1 – left hand:  $r = .18, p = .30$ . Corresponding correlation matrices and  
167 plots are presented in Figures 7A-B, 7G-H and 8, respectively. Mantel tests were also performed per  
168 participant (right M1 – left hand:  $r$  range:  $-.25$  to  $.75$ ; significant ( $p < .05$ ) in 3 out of 15 participants,  
169 right S1 – left hand:  $r$  range:  $-.25$  to  $.75$ ; significant ( $p < .05$ ) in 3 out of 15 participants, left M1 – right  
170 hand:  $r$  range:  $-.12$  to  $.89$ ; significant ( $p < .05$ ) in 3 out of 15 participants, left S1 – right hand:  $r$  range:  
171  $-.24$  to  $.79$ ; significant ( $p < .05$ ) in 5 out of 15 participants).

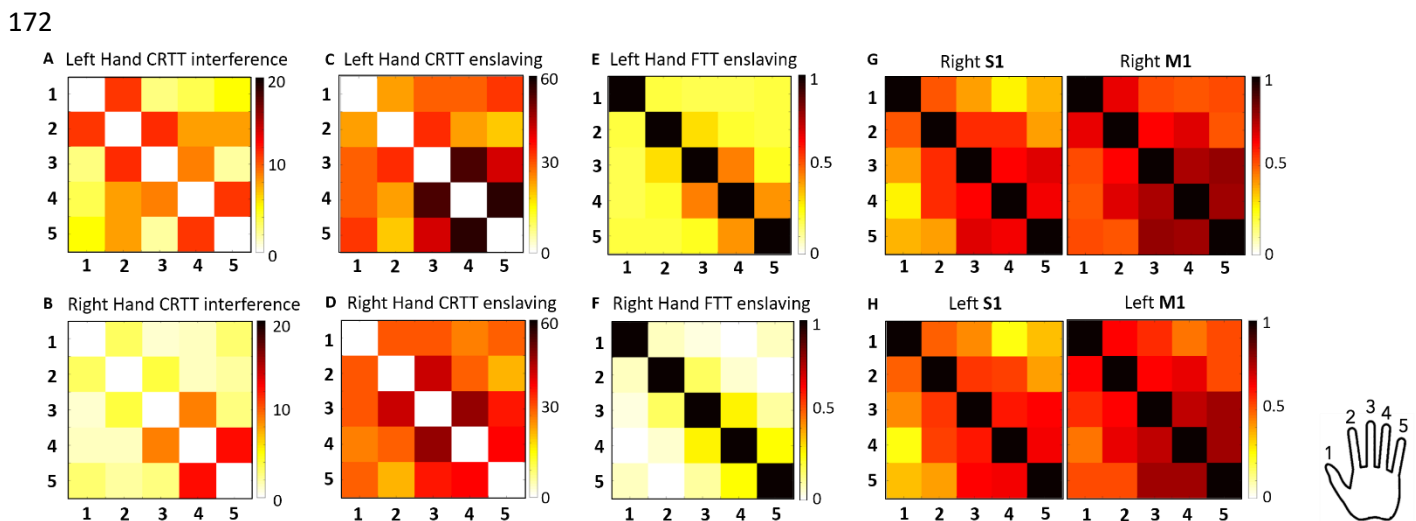

**Figure 7.** Similarity matrices of group average. **A-B:** Matrices represent interference scores of CRTT arranged into a matrix with darker colors representing more interference between digit pairs. **C-D:** Matrices represent enslaving scores of CRTT arranged into a matrix with darker colors representing more enslaving between digit pairs. **E-F:** Matrices represent enslaving scores of FTT arranged into a matrix with darker colors representing more enslaving between digit pairs. **G-H:** Matrices represent similarity structures of fMRI data for S1 and M1 of the right hemisphere in the top row and S1 and M1 of the left hemisphere in the bottom row. Dark colors represent higher correlation coefficients, i.e., more similar activation patterns between digit pairs. Numbers 1 to 5 represent digits D1 to D5 for rows and columns.

173

174

175



176

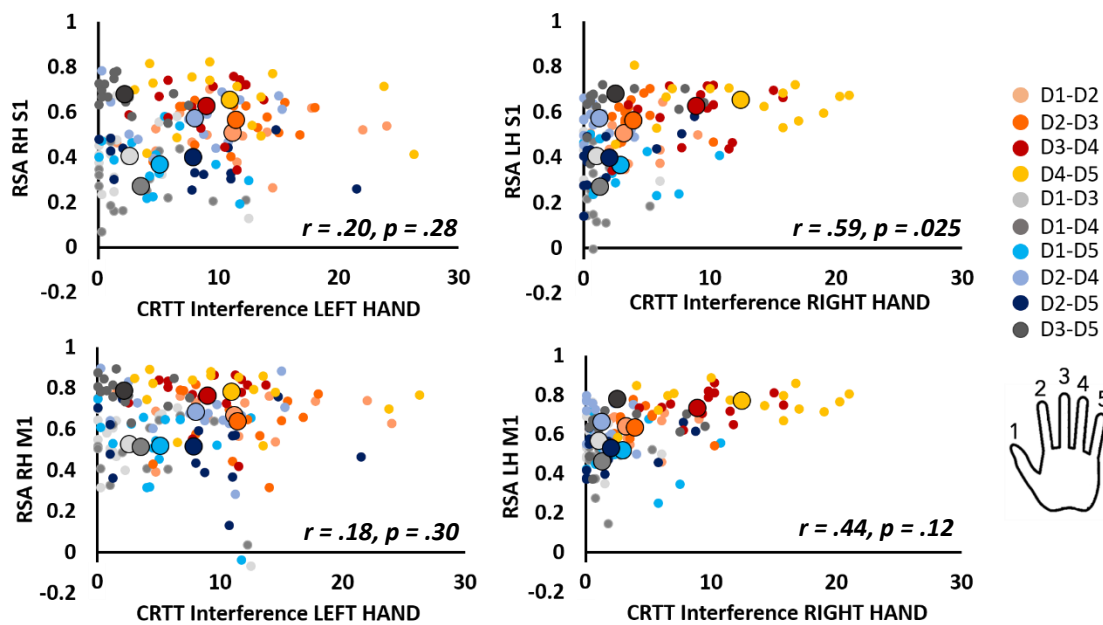

**Figure 8.** Correlation plots displaying association between digit interference of the left hand (panels on the left) and right hand (panels on the right) during CRTT and RSA values of the contralateral S1 (top row) and M1 (bottom row). Cool colors refer to non-neighboring digit pairs. Warm colors refer to neighboring digit pairs. Small dots represent individual data points; large dots represent the group average per digit pair. RH = right hemisphere, LH = left hemisphere, M1 = primary motor cortex, S1 = primary somatosensory cortex.  $r$  and  $p$  values represent outcomes of the Mantel Tests across participants.

177

178 **Digit enslaving and cortical digit similarity scores** As there were no significant  
179 differences between digit enslaving for the uni- and bimanual coordination mode, we averaged these  
180 values and arranged them in a symmetrized enslaving matrix for the left and right hand separately. To  
181 assess whether co-contraction of non-instructed fingers during a choice reaction time task has a cortical  
182 origin, we correlated the CRTT digit enslaving matrix with the similarity matrix of the contralateral  
183 brain data. Mantel tests with 5000 permutations, averaged across participants, revealed that cortical digit  
184 representations of the left hemisphere were predictive of the digit enslaving structure in the contralateral  
185 hand; left M1 – right hand:  $r = .64$ ,  $p = .03$ ; left S1 – right hand:  $r = .77$ ,  $p = .02$ . These findings indicate  
186 that higher similarity scores between activation patterns at the level of left M1 and left S1 (i.e., more  
187 overlap between digit representations), are associated with more digit enslaving (i.e., co-activation of  
188 non-cued digits with cued digit). For the right hemisphere, Mantel tests did not reach the significance  
189 level, but demonstrated a similar trend; right M1 – left hand:  $r = .61$ ,  $p = .07$ ; right S1 – left hand:  $r =$   
190  $.60$ ,  $p = .08$ . Corresponding correlation matrices and plots are presented in Figures 7C-D, 7G-H and 9,  
191 respectively. Mantel tests were also performed per participant; right M1 – left hand:  $r$  range: .08 to .82;  
192 significant ( $p < .05$ ) in 5 out of 15 participants, right S1 – left hand:  $r$  range: -.22 to .77; significant ( $p <$   
193  $.05$ ) in 5 out of 15 participants, left M1 – right hand:  $r$  range: -.01 to .83; significant ( $p < .05$ ) in 4 out of  
194 15 participants, left S1 – right hand:  $r$  range: -.15 to .85; significant ( $p < .05$ ) in 7 out of 15 participants.

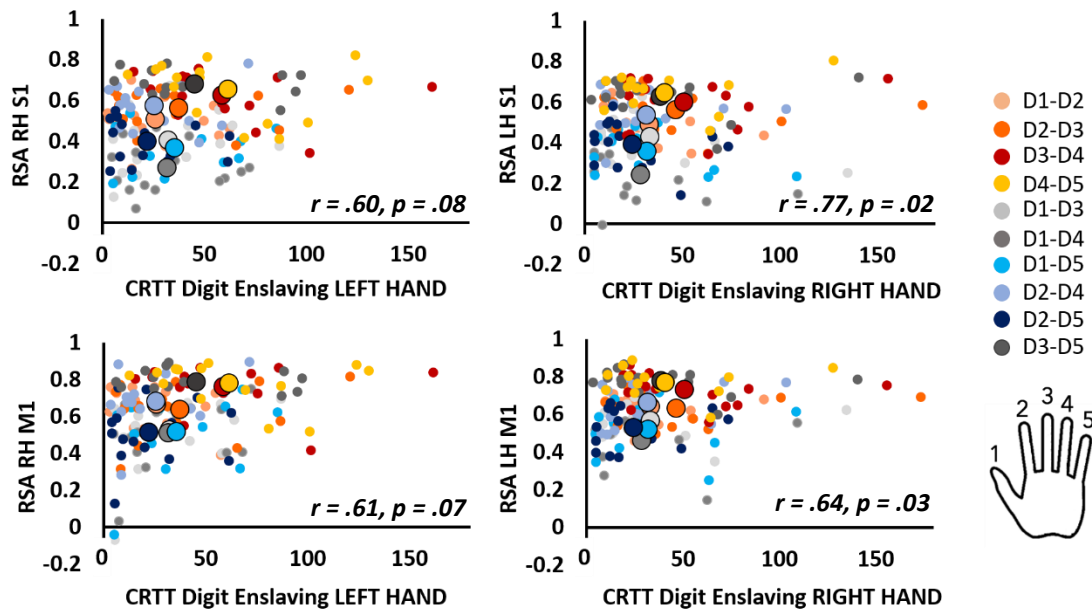

**Figure 9.** Correlation plots displaying association between digit enslaving of the left (panels on the left) and right (panels on the right) hand during CRTT and RSA values of the contralateral S1 (top row) and M1 (bottom row). Cool colors refer to non-neighboring digit pairs; warm colors refer to neighboring digit pairs. Small dots represent individual data points; large dots represent the group average per digit pair. RH = right hemisphere, LH = left hemisphere, M1 = primary motor cortex, S1 = primary somatosensory cortex.  $r$  and  $p$  values represent outcomes of the Mantel Tests across participants.

195

196 *Finger Tapping Task inside MR scanner – Digit enslaving*

197 **Digit enslaving** A repeated-measures ANOVA on the vectorized correlation  
 198 coefficients between digit pairs during the FTT revealed no main effect of Hand ( $F(1,14) = .04, p = .85$ ),  
 199 a main effect of Digit pair ( $F(9,126) = 26.17, p < .001$ ), and no interaction effect between Hand and  
 200 Digit pair ( $F(9,126) = .86, p = .56$ ). Tukey post-hoc pairwise comparisons revealed that digit pairs D2-  
 201 D3, D3-D4 and D4-D5 reached higher correlation coefficients relative to all other digit pairs ( $p_s < .001$ ).  
 202 Results are presented in Figure 10. In addition, we used Mantel tests to demonstrate that the structure of  
 203 FTT digit enslaving in the left hand was related to the structure of FTT digit enslaving in the right hand  
 204 (across participants,  $r = .85, p = .008$ ;  $r$  range: .16 to .99; significant ( $p < .05$ ) in 9 out of 15 participants).  
 205 The corresponding correlation plot is presented in Figure 11.

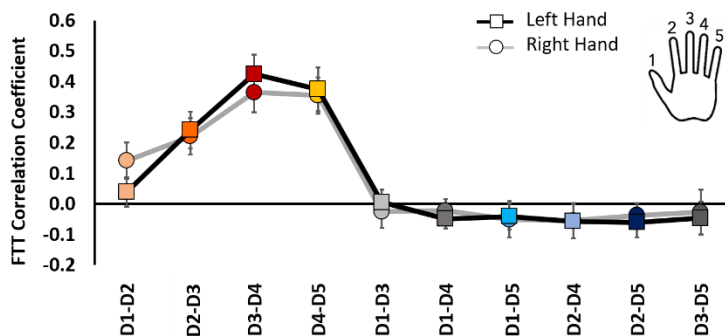

**Figure 10.** Digit enslaving during FTT. Error bars indicate standard error of the mean. Cool colors refer to non-neighboring digit pairs; warm colors refer to neighboring digit pairs.

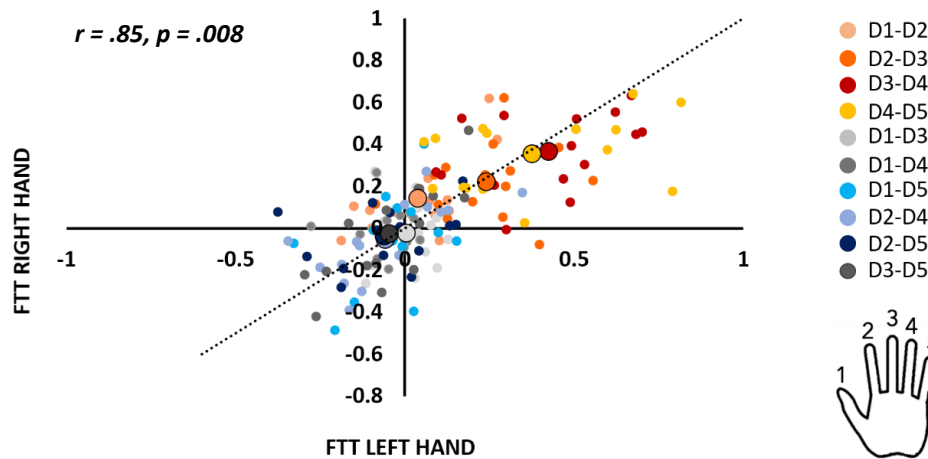

**Figure 11.** Correlation plot displaying association between digit enslaving of the left and right hand during FTT. Cool colors refer to non-neighboring digit pairs. Warm colors refer to neighboring digit pairs. The dotted line represents an identity line demonstrating no difference in digit enslaving between the two hands. Small dots represent individual data points; large dots represent the group average per digit pair.  $r$  and  $p$  value represent outcome of the Mantel Test across participants.

206

207 **Digit enslaving and cortical similarity scores** To assess whether co-contraction of non-  
208 instructed fingers during a continuous finger tapping task has a cortical origin, we correlated the FTT  
209 enslaving matrix with the similarity matrix of the contralateral brain data. Mantel tests with 5000  
210 permutations, averaged across participants, revealed that cortical representations were correlated with  
211 the FTT digit enslaving pattern of the contralateral hand; right M1 – left hand:  $r = .78$ ,  $p = .03$ ; right S1  
212 – left hand:  $r = .81$ ,  $p = .03$ ; left M1 – right hand:  $r = .75$ ,  $p = .03$ ; left S1 – right hand:  $r = .84$ ,  $p = .01$ .  
213 These findings indicate that higher similarity scores between activation patterns at the level of the  
214 sensorimotor cortex (i.e., more overlap between digit representations), are associated with more  
215 contralateral digit enslaving (i.e., co-activation of non-cued digits with cued digit). Correlation matrices  
216 and plots are presented in Figures 7E-F, 7G-H and 12, respectively. Mantel tests were also performed  
217 per participant (right M1 – left hand:  $r$  range:  $-.02$  to  $.84$ ; significant ( $p < .05$ ) in 7 out of 15 participants;  
218 right S1 – left hand:  $r$  range:  $-.04$  to  $.88$ ; significant ( $p < .05$ ) in 4 out of 15 participants, left M1 – right  
219 hand:  $r$  range:  $-.05$  to  $.82$ ; significant ( $p < .05$ ) in 5 out of 15 participants, left S1 – right hand:  $r$  range:  
220  $.09$  to  $.90$ ; significant ( $p < .05$ ) in 7 out of 15 participants).

221

222

223

224

225

226

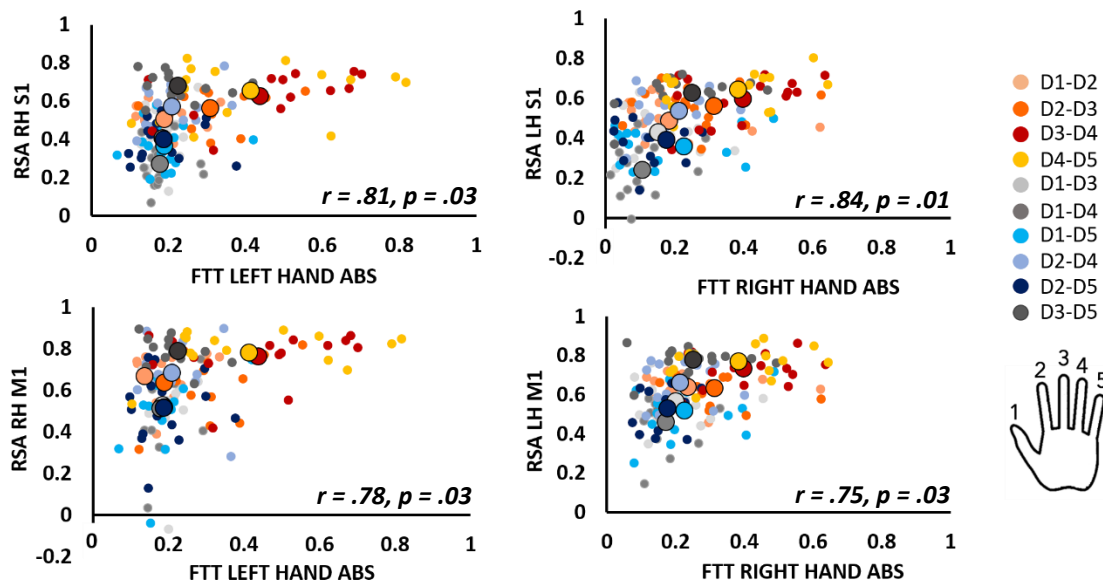

**Figure 12.** Correlation plots displaying association between digit enslaving of the left (panels on the left) and right (panels on the right) hand during FTT and RSA values of the contralateral S1 (top row) and M1 (bottom row). Cool colors refer to non-neighboring digit pairs. Warm colors refer to neighboring digit pairs. Small dots represent individual data points; large dots represent the group average per digit pair. RH = right hemisphere, LH = left hemisphere, M1 = primary motor cortex, S1 = primary somatosensory cortex, ABS = absolute correlation coefficients.  $r$  and  $p$  values represent outcomes of the Mantel Tests across participants.

227

## 228 Discussion

229 Here, we applied a multivariate approach to explore cortical representations of digits in the pre-central  
230 and post-central gyri and investigated how these relate to specific motor behavior at the level of  
231 individual digits. We found that digit enslaving during continuous finger tapping was significantly  
232 associated with contralateral SM1 representational similarity scores of both hands. During the choice  
233 reaction time task, digit enslaving of the right hand only was significantly associated with  
234 representational similarity scores of the contralateral left SM1. Additionally, right hand digit  
235 interference (i.e., inability to inhibit non-cued fingers) was significantly associated with representational  
236 similarity scores of left S1. In conclusion, we demonstrate a cortical origin of digit enslaving and  
237 uniquely reveal that effector selection (i.e., planning) during CRTT (as reflected by digit interference)  
238 is predicted by digit representations in the contralateral somatosensory cortex.

## 239 Behavior

240 With the *digit interference* score, obtained from the CRTT, we aimed for a measure that indicates the  
241 failure to preserve selective motor inhibition (Prigatano et al., 2020), reflecting the preparatory process  
242 of effector selection. Unlike digit enslaving levels during the performance of the CRTT (see further),  
243 digit interference revealed a significant difference between the dominant and non-dominant hand, with  
244 a reduction in adequately inhibiting inappropriate (non-cued) responses for digits of the non-dominant

245 hand. Although these findings are in contrast with recent findings by Prigatano et al., (2020) who applied  
246 the Halstead Finger Tapping Test, our findings are consistent with the phenomenon of surround  
247 inhibition (Beck & Hallett, 2011) being more pronounced in the dominant hemisphere of right-handed  
248 participants. That is, a more efficient selective execution of desired movements is achieved in the  
249 dominant hand (Shin, Sohn, & Hallett, 2009). Although one could argue a potential floor effect in the  
250 dominant right hand, particularly for neighboring digits there seems to be room for improvement  
251 concerning the interference scores. Despite that absolute interference scores showed a marked difference  
252 between hands, we found a highly comparable overall pattern of interference scores across digits  
253 between the left and right hand. Not surprisingly, neighboring digits revealed higher interference scores  
254 relative to non-neighboring digits across both hands.

255 During both the time-pressured CRTT and the continuous FTT, we demonstrated that the highest *digit*  
256 *enslaving* (i.e., co-activation) levels are particularly present for neighboring digits including D2, D3, D4  
257 and D5. D1 (i.e., thumb) represents a rather distinct pattern in comparison to all other digits, suggesting  
258 rather independent behavior. These findings extend the work by Ejaz and colleagues (2015) which  
259 similarly revealed enslaving of adjacent fingers, albeit when performing a single finger maximal  
260 voluntary contraction. These results indicate that, irrespective of task variations such as finger lifting  
261 versus finger pressing, co-movements of adjacent fingers, in particular, are present. Noteworthy, we did  
262 not observe significant differences in digit enslaving between the non-dominant and dominant hand.  
263 This is in line with the majority of previous studies reporting no (Hager-Ross & Schieber, 2000; Kimura  
264 & Vanderwolf, 1970; Reilly & Hammond, 2004; Wilhelm, Martin, Latash, & Zatsiorsky, 2014) or very  
265 small differences in digit enslaving between the two hands (Li, Danion, Latash, Li, & Zatsiorsky, 2000a,  
266 2000b). The absence of a significant difference in digit enslaving between the dominant and non-  
267 dominant hand suggests that the more extensive and more fine-grained use of the dominant hand in  
268 everyday motor activities relative to the non-dominant hand, does not result in higher levels of digit  
269 enslaving (Wilhelm et al., 2014). Of note, digit enslaving in the CRTT was measured in a sitting position,  
270 whereas digit enslaving in the FTT was measured in a supine position (in the MR scanner). As the  
271 enslaving matrices resulting from CRTT and FTT performance were highly correlated, this suggests that  
272 there is little to no effect of participant posture and task paradigm on digit enslaving at the behavioral  
273 level.

#### 274 Cortical activation patterns

275 We observed that the representations of activity patterns in M1 and S1 in response to individuated finger  
276 movements were markedly similar. That is, the relative distribution of brain activity representing  
277 individual digit movements within one hand is comparable between M1 and S1 within the same  
278 hemisphere. Notably, within the non-dominant right hemisphere and particularly for neighboring digit  
279 pairs, absolute correlation coefficients were significantly higher in M1 relative to S1. A similar trend

280 was observed in the dominant left hemisphere, although not surviving corrections for multiple testing.  
281 These findings indicate that although the pattern was comparable, the activity patterns of single digits  
282 revealed higher similarity scores in M1 than in S1. This was expected based on previous studies  
283 reporting a more distinct homunculus-like pattern of digit activations in the post-central relative to the  
284 pre-central gyrus (Huber et al., 2020; Martuzzi et al., 2014; Sanchez Panchuelo et al., 2018). This is  
285 likely the result of everyday coordinated use of digits when for example grasping, writing, or picking  
286 up objects. The hemispheric difference, i.e., a significant difference between M1 and S1 in the right, but  
287 not the left hemisphere is likely the result of the right hemisphere mainly controlling the non-dominant  
288 left hand, which may predispose simultaneous over individuated finger movements given its stabilizing,  
289 supporting role in many coordinated movements requiring division of labor between hands. As a result  
290 hereof, more overlap between digit representations is anticipated in M1, prompting a larger difference  
291 with S1 in which individual representations of digits are clearly distinguishable irrespective of everyday  
292 movements.

293 Importantly, our findings did not reveal a significant lateralization effect when directly comparing digit  
294 representations in M1 left with M1 right, and in S1 left with S1 right. This suggests that it is particularly  
295 the within-hemisphere interplay between M1 and S1, structurally connected through U-shaped white  
296 matter fibers (Catani et al., 2012; Guevara et al., 2011; Shinoura et al., 2005), that is subject to  
297 experience-induced changes. As similarity scores are hardly studied in both hemispheres, our data add  
298 important new knowledge indicating that although the representational patterns were highly correlated  
299 between M1 and S1 in both hemispheres, particularly in the non-dominant right hemisphere higher  
300 correlation values between digits (suggesting more overlap) were found in M1 compared with S1. Of  
301 note, unlike the majority of the work on digit somatotopy in S1, we assessed digit representations based  
302 on active finger movements, and not passive stroking of digits.

### 303 Association behavior and cortical activation patterns

#### 304 *The cortical origin of digit enslaving*

305 To the best of our knowledge, our findings demonstrate for the first time that the digit enslaving matrix  
306 of the right hand during the performance of a time-pressured CRTT was significantly associated with  
307 the pattern of digit representations in the contralateral sensorimotor cortex. This finding significantly  
308 adds to work by Ejaz and colleagues (2015), revealing a neural source of digit enslaving while  
309 performing a maximal isometric force production task. Although correlations between digit enslaving  
310 of the left hand and digit activation patterns of right M1 and S1 were trending towards significance as  
311 well, there is a potential influence of body side/hemisphere. As attested by the correlation matrices and  
312 plots, it is likely that the source of this hemispheric difference is found at the behavioral level.

313 Moreover, further supporting the cortical origin of digit enslaving, we reported high correlations  
314 between FTT digit enslaving of the left and right hand and representational similarity matrices of the



315 contralateral sensorimotor cortices. Although it is to some extent surprising that digit enslaving for FTT,  
316 but not for CRTT, revealed strong associations with neural representations in both hemispheres, it should  
317 be noted that the representational similarity analyses were performed on data acquired during FTT and  
318 not CRTT performance (which was performed outside the MR scanner). Moreover, whereas the FTT  
319 requires repetitive tapping and is therefore easy to sustain and less error-prone, the CRTT does instigate  
320 errors as participants are forced to make a choice under time pressure. Although we merely included  
321 trials in which the cued finger was correctly lifted, digit enslaving values could have been influenced by  
322 the erroneous lifting of neighboring digits.

323 Although the cortical origin of digit enslaving was previously suggested (Lang & Schieber, 2004; Yu,  
324 van Duinen, & Gandevia, 2010; Zatsiorsky, Li, & Latash, 2000), the first evidence was published only  
325 recently and demonstrated stronger digit enslaving to be related with more similar activation patterns in  
326 the sensorimotor cortex, by employing multi-voxel pattern fMRI analyses (Ejaz et al., 2015). However,  
327 digit enslaving in the latter study was assessed during isometric force production with right hand digits  
328 only in a small sample (n=7). Here, we move beyond their findings by uniquely demonstrating that more  
329 similar activation patterns between digits in the sensorimotor cortices of both hemispheres are predictive  
330 of higher digit enslaving in the contralateral hands during a continuous finger tapping and a time-  
331 pressured choice reaction time task.

### 332 *Digit interference is partly predicted by digit activation patterns in the sensorimotor cortex*

333 It was anticipated that the ability to independently move a cued finger, and at the same time inhibit non-  
334 cued fingers (reflecting effector selection processes), would be associated with the cortical digit  
335 activation patterns of the contralateral primary sensory and particularly motor cortex. That is, the more  
336 similar activation patterns for digit pairs are, the more likely the occurrence of incorrect (co-)lifting of  
337 non-cued fingers. In the present dataset, a significant positive association was found between the  
338 similarity scores of left S1 and interference scores of the right (dominant) hand digits. This suggests that  
339 higher digit interference (i.e., reduced inhibition of (adjacent) non-cued fingers) was significantly  
340 associated with more overlapping activation patterns in S1 in particular. Although a more prominent  
341 association was principally anticipated in M1, it is not surprising that the somatosensory cortex is  
342 involved as participants were asked to fixate on the screen and not look at their fingers, forcing them to  
343 rely on proprioceptive and tactile feedback to perform the CRTT. Furthermore, recent work provides  
344 evidence that also S1 changes its neural state to prepare for proprioceptive and sensory signals to occur  
345 as a result of movement execution (Gale et al., 2021) and to predict the planned finger movement (Ariani  
346 et al., 2021). Nonetheless, the concept of surround inhibition, a process likely occurring during the motor  
347 planning phase (Beck & Hallett, 2010) is potentially more dependent on higher-order motor areas and/or  
348 fronto-thalamic pathways than on digit similarity scores in SM1. Finally, interference scores were  
349 possibly impacted by visual discrimination errors (i.e., incorrectly differentiating between neighboring

350 cued digits on the screen). However, relatively large interference scores were also observed for the most  
351 peripheral digits (D1-D2 & D4-D5), which should be visually discriminated more easily relative to digits  
352 D2, D3 and D5. Thus, we may infer from our findings that for CRTT digit interference, contralateral  
353 representational digit activation patterns are particularly relevant in the sensory cortex and, unlike for  
354 digit enslaving, less so in the motor cortex. Potentially, visual processing or higher-order motor areas  
355 are more involved in this process of digit interference. Future studies are, however, necessary to confirm  
356 these indications.

357 As a final remark, we would like to point towards the substantial inter-individual variability that was  
358 observed for the majority of Mantel outcomes (Mantel tests were used to assess the association between  
359 two correlation matrices at the neural and the behavioral level). This suggests that despite including a  
360 fairly homogeneous sample, unique individual experiences appear to shape digit patterns at the  
361 behavioral as well as the neural level, while retaining general similarity scores at the group level.

## 362 Conclusion

363 Overall, our findings suggest a mapping between topographical digit representations in SM1 and  
364 contralateral digit enslaving behavior. Additionally, we provide a first indication in a healthy young  
365 population that the ability to individually move a cued digit and simultaneously actively inhibit non-  
366 cued digits (i.e., effector selection/motor planning) is associated with the amount of overlap in the  
367 distributed mapping of these individual digits in S1, but not M1.

368

## 369 **Materials and methods**

### 370 Participants

371 A total of 16 healthy young adults were included in the present study (7 males, mean age = 24.4 years,  
372 SD = 2.7, range = 21.4 – 30.3). All participants were right-handed according to the Edinburgh  
373 Handedness Scale (Oldfield, 1971). The mean laterality quotient was 90.6% (SD = 12.9, range 70-100).  
374 Participants were excluded from the study in case of usage of psychoactive medication, a history of drug  
375 abuse, psychiatric or neurological disease, significant multiple trauma, or in the case of MRI  
376 contraindications. Additionally, given the potential effect of years of musical training on finger  
377 representations in the sensorimotor cortex, musical experience was assessed by means of the Musical  
378 Experience Questionnaire (J. Bailey & Penhune, 2012; J. A. Bailey & Penhune, 2010). Participants who  
379 reported playing a musical instrument or had experienced more than 3 years of formal musical training  
380 at the time of testing, were excluded. All participants were informed about the study and provided  
381 written informed consent prior to participation, according to the Declaration of Helsinki. All  
382 experimental procedures were approved by the ethics committee in Leuven (S58357) and the Medical  
383 Ethical Committee of the Maastricht University.

384 **Experimental design**

385 Two sessions were administered: a behavioral session which took place at the Motor Control Laboratory  
386 of the KU Leuven, and an imaging session at the Maastricht Brain Imaging Center, within an average  
387 time window of 9 days (SD = 5.61).

388 *Behavioral procedure*

389 In our experiment, two behavioral tasks were included, i.e., the Choice Reaction Time Task (CRTT) and  
390 the Finger Tapping Task (FTT). These tasks were selected as they are complementary in terms of  
391 underlying processes during effector movements. Whereas the first relies profoundly on effector  
392 selection processing (i.e., planning), the latter is mainly involved with effector output processes (i.e.,  
393 execution). Below, we provide more detail for each of these tasks.

394 **Choice Reaction Time Task** In order to assess the association between individual  
395 digit representations in the sensorimotor cortex and the ability to accurately and efficiently select (i.e.,  
396 plan) and move individual cued digits, we included a Choice Reaction Time Task (CRTT) in our  
397 experimental design. More specifically, participants were asked to lift a particular digit as fast as  
398 possible in response to a specific visual stimulus. During CRTT performance, participants were seated  
399 comfortably at a table in front of a PC screen with their lower arms positioned on the table and fingertips  
400 resting on a set of force transducers. A custom-made set-up consisting of ten force transducers  
401 (Honeywell FS series, (based on Ejaz et al., 2015)) pinned on a plate (Figure 13A), was positioned on  
402 the table in front of the participant. For each force transducer, a 3D-printed acrylonitrile Butadiene  
403 Styrene holder with a peg at the bottom was created, to fixate the transducers to the plate. This allowed  
404 for adjustment of the force transducers to ensure a natural position of the fingers for each participant  
405 and easy handling of the force sensors. During the task, participants were presented with multiple stimuli  
406 (i.e., ten individual digits) on the monitor in front of them and were required to respond as fast and as  
407 accurately as possible to the cued stimulus/digit with the corresponding finger. More specifically, at the  
408 start of each run, a message was presented on the monitor in front of the participant (duration of 2  
409 seconds) warning the participant to prepare for the upcoming trials. Next, two schematic white hands  
410 with a fixation cross in the middle were displayed. Participants were instructed to fixate on the cross  
411 throughout the task. At the start of each trial, one finger switched to a red color (= visual cue), indicating  
412 to the participant to lift the respective finger from the force transducer, and to smoothly return the  
413 responding finger to its neutral position afterward. After each trial, there was a short delay of 1.33  
414 seconds (movement frequency was 0.75 Hz), before the next cue was presented. The order of visual  
415 cues was pseudo-randomized. The CRTT was performed in 3 runs; (#1) unimanual left hand, (#2)  
416 unimanual right hand, and (#3) bimanual. For the unimanual runs (#1 and #2), 150 trials were included,  
417 presented to the participant in three blocks of 50 trials, with a rest period of 18 seconds in between. For  
418 the bimanual run (#3), 300 trials were included, presented to the participants in six blocks of 50 trials,

419 with a rest period of 18 seconds in between. In total, participants responded 90 times with each finger.  
420 An overview of the CRTT task conditions is provided in Figure 13B. Participants were allowed a short  
421 practice run to familiarize themselves with the set-up and task. In order to calibrate the force transducers,  
422 baseline measurements (i.e., no fingers on the force transducers) were taken prior to the first run, and  
423 after the last run. As all force transducers were set up to continuously register force levels throughout  
424 the task, and participants were instructed to keep all fingers on the force transducers at all times (except  
425 when cued), co-activation of non-cued fingers was also measured. This experimental set-up allowed us  
426 to assess digit enslaving (i.e., the degree to which a cued digit is able to move individually while non-  
427 cued fingers remain stationary) and digit interference (see “Analysis of behavioral data”) during a time-  
428 pressured reaction time task.

429 **Finger Tapping Task** In order to assess the relationship between individual digit  
430 representations in the sensorimotor cortex and digit enslaving during a simple, continuous movement,  
431 we included a Finger Tapping Task (FTT). As this task was also used to localize digit activation patterns  
432 in the sensorimotor cortex, the FTT was performed in a supine position on the extendible table of the  
433 MRI scanner. The custom-made MR-compatible set-up that was used for the CRTT (see above), was  
434 positioned over the participant’s lap at a comfortable distance (Figure 13C). Force transducers were  
435 positioned per participant to ensure easy handling of the sensors and a natural position of the fingers and  
436 wrists. Small cushions underneath the plate were provided to increase comfort, and foam cushions were  
437 placed around the head to limit head movements. The task was displayed via a video projector and  
438 viewed via a double mirror, mounted to the head coil. The FTT consisted of four runs according to a  
439 block design. Each block started with an instruction screen indicating which finger to move in the  
440 upcoming finger tapping block (duration of 2 seconds). Next, a finger tapping block (duration of 20  
441 seconds), and an inter-block rest period (average duration of 10 seconds) followed. During the finger  
442 tapping block, a black screen with two white hands and a fixation cross in the center were displayed.  
443 The instructed finger for a given trial switched color between white and red at a fixed frequency (1.5  
444 Hz). The participant was instructed to move the corresponding finger [i.e., alternation of extension  
445 (fingertip touches the force transducer) and hyperextension (finger is in the air above the force  
446 transducer)] according to the visually imposed speed (i.e., 1.5 Hz), resulting in 30 taps of a given finger  
447 per finger tapping block. During the inter-block rest period, the visual display was identical, but without  
448 the coloring of a finger and participants were instructed to relax their fingers positioned on the force  
449 transducers. There were 2 unimanual runs (one for each hand) consisting of 12 finger tapping blocks  
450 each, in which tapping of the index finger (digit 2 – D2) was interspersed with the tapping of the ring  
451 finger (digit 4 – D4), resulting in 180 taps per finger. In addition, there were 2 runs (one for each hand)  
452 consisting of 18 finger tapping blocks each, in which tapping of the thumb (digit 1 – D1), tapping of the  
453 middle finger (digit 3 – D3), and tapping of the little finger (digit 5 – D5) were alternated in blocks,  
454 resulting in 180 taps per finger. The order of runs, as well as the order of conditions (i.e., digit) within

455 the runs, were pseudo-randomized. An overview of the FTT task conditions is provided in Figure 13B.  
456 In order to calibrate the force transducers, baseline measurements (i.e., no fingers on the force  
457 transducers) were taken prior to the first, and after the last run. In addition to measuring digit enslaving,  
458 the output of the force transducers was used to verify task compliance.  
459 Computer programming for both the CRTT and the FTT was done using National Instruments  
460 Laboratory Virtual Instrumentation Engineering Workbench (LabVIEW 2016, 32 bit).

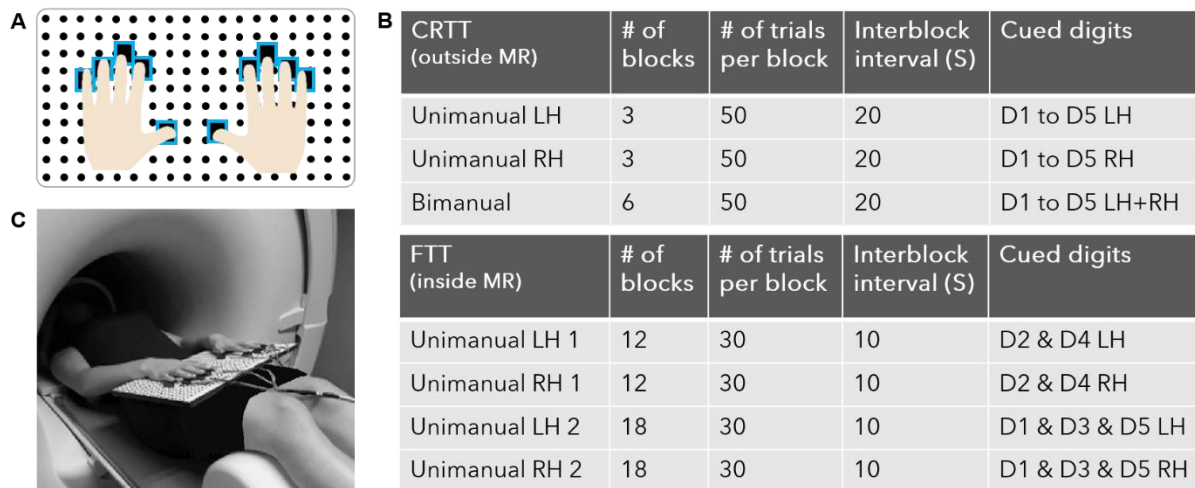

**Figure 13.** Experimental set-up and task conditions. **Panel A)** The experimental set-up with the fingers positioned on the force sensors. Force sensors were fixated into 3D printed holders with pegs underneath (in blue), which in turn could be placed inside the small holes of the wooden plate. **Panel B)** Overview of all task conditions during the CRTT outside the MR scanner (top) and the FTT inside the MR scanner (bottom). S = seconds; LH = left hand, RH = right hand, D1 = thumb, D2 = index finger, D3 = middle finger, D4 = ring finger, D5 = little finger. **Panel C)** the position of the participant (laying supine in MR scanner) with the experimental set-up resting on the lap of the participant ensuring a comfortable position of the wrists, hands and fingers.

461

## 462 Imaging procedure

463 A Siemens Magnetom 7T magnetic resonance scanner with a 32-channel head coil (Nova Medical) was  
464 used. High-resolution T1-weighted structural images were acquired using magnetization-prepared 2  
465 rapid acquisition gradient echo (repetition time/echo time = 5000/2.47 ms, voxel size = 0.7 x 0.7 x 0.7  
466 mm<sup>3</sup>, 240 slices; scan time was 9:42 minutes). While participants were performing the finger tapping  
467 task, functional images were acquired with a multiband gradient echo (GE) echo planar imaging (EPI)  
468 pulse sequence (repetition time/echo time = 2000/18.6 ms, flip angle = 75°, 92 slices, slice thickness =  
469 1.25 mm, in-plane resolution = 1.25 x 1.25 mm, multiband factor 2, GRAPPA acceleration factor 3),  
470 phase encoding direction anterior to posterior. In total, the fMRI acquisition took ~ 35 minutes. In order  
471 to correct for off-resonance distortions in the functional images, six additional volumes were acquired  
472 with a reversed phase encoding direction (posterior to anterior).

## 473 Analysis

474 *Behavioral analysis*

475 The CRTT and FTT data were analyzed using both Matlab (R2018b) and Microsoft Excel (2016). For  
476 both tasks, data from all ten force transducers (one for each finger) were analyzed by means of in-house  
477 developed Matlab scripts. At first, baseline data (i.e., the signal from force transducers when digits were  
478 not on the sensors) were subtracted from the raw signals during task performance, not allowing negative  
479 force levels. As baseline data recording of the right thumb for two subjects was problematic, data of the  
480 respective digit were removed from further analyses. In addition, one subject did not adhere to the task  
481 instructions during the FTT (on which the cortical digit representations are based), resulting in the  
482 exclusion of this participant from all further analyses.

483 **Choice Reaction Time Task** For the CRTT, we obtained the following outcome variables:  
484 interference score, digit enslaving, reaction time and accuracy. Each of these is further explained in the  
485 section below. Of note, findings on reaction time and accuracy are presented in the Supplementary  
486 material.

487 In order to determine the above mentioned outcome variables, using `pwfit`, a publically available Matlab  
488 script, we fitted a single curve onto the baseline-corrected force data for each digit separately. To detect  
489 a correct response, i.e., lifting a cued digit, we searched within the fitted curve for the lowest voltage  
490 after presenting the cue. For a correct response, a voltage drop to zero should be present in the fitted  
491 curve of the cued digit. Importantly, the CRTT lends itself for measuring accuracy of the cued digits  
492 and the non-cued digits at the same time. The former provides an indication of correct excitation,  
493 referring to the number of correct trials, i.e., correctly lifting the cued digit (= *accuracy*). The latter  
494 provides an indication of the ability to inhibit competing incorrect alternatives. Here, we expressed the  
495 latter as an error score (= *interference score*), i.e., counting the number of incorrect lifts of non-cued  
496 digits. More specifically, for each non-cued digit we calculated the number of times this digit was lifted  
497 incorrectly with the cued digit. The maximum error score is therefore equal to the numbers of trials per  
498 digit, i.e., 30. Interference scores were calculated within hand, resulting in a 5 (D1-D5) x 5 (D1-D5)  
499 non-symmetrical matrix per hand including 4 interference scores (= all non-cued digits of the same  
500 hand) per cued digit, with the diagonal being zero. Moreover, to assess *digit enslaving* in all non-cued  
501 fingers relative to the cued finger (within one hand), we followed the procedure reported by Ejaz et al.,  
502 (2015). During each correct trial (i.e., where the cued finger was lifted from the force transducer), we  
503 calculated the sum of the difference in force levels between pre-trial baseline and post-cue presentation  
504 for each non-cued finger. Importantly, any change in the continuous force signal of the non-cued digits  
505 was included, i.e., digits were not necessarily completely disconnected from the sensor. These co-  
506 activation values were arranged into a digit enslaving matrix for the CRTT. Finally, the time elapsing  
507 from the cue presentation to a voltage drop in the continuous force signal was calculated as the *reaction*  
508 *time* in milliseconds.



509           **Finger Tapping Task** For the FTT, we obtained digit enslaving as the sole outcome variable.  
510 In order to do so, we analyzed the force data throughout the duration of the task. To find the frequency  
511 components of the original force signals (including noise), first a Fast Fourier Transform algorithm was  
512 applied. As the imposed movement frequency was 1.5 Hz, we selected all frequency components  
513 between 1.0 and 2.0 Hz. Next, signals for each individual digit were smoothed using a Savitzky-Golay  
514 finite impulse response smoothing filter. Per trial, for each cued finger, we searched for drops in the  
515 smoothed signal, as the digit was lifted from the force sensor. To determine digit enslaving in non-cued  
516 digits, correlation coefficients were determined from the sinewaves of each non-cued finger and the  
517 sinewave of the cued finger. A positive correlation reflects a co-contraction, i.e., the non-cued finger  
518 moves along with the instructed finger, whereas a negative correlation reflects a supporting movement,  
519 i.e., the non-cued finger increases the force level onto the transducer to support the continuous tapping  
520 of the instructed finger. Correlation values were averaged across blocks of the same cued finger.  
521 Correlation coefficients were arranged into a 5 (D1-D5) x 5 (D1-D5) digit enslaving matrix for the FTT.

#### 522 *Imaging analysis*

523 Data preprocessing and analyses of functional time series were performed using the BrainVoyager  
524 software package v20.6 (Brain Innovation BV, Maastricht, The Netherlands,  
525 <http://www.brainvoyager.com>). To ensure T1 equilibration, the first two volumes from each fMRI run  
526 were removed. Pre-processing included slice-timing correction, 3D motion correction to realign all EPIs  
527 to the first volume, and temporal high-pass filtering (with a cut-off at 2 cycles, GLM Fourier basis set).  
528 Subsequently, EPI distortion correction was performed using the Correction based on Opposite Phase  
529 Encoding (COPE) plugin within BrainVoyager (Breman et al., 2020) to correct for geometric distortions.  
530 A voxel displacement map was calculated and the image series was corrected with the resulting  
531 displacement map. The resulting EPIs were coregistered to the individual anatomical images (gradient-  
532 based affine alignment with 9 parameters), resampled to 1.5 mm isotropic resolution, and analyzed by  
533 means of a general linear model (GLM). For each experimental run, a design matrix was created  
534 including a regressor for each individual digit, for the instruction phase and for the inter-block rest  
535 periods, supplemented with six z-transformed motion parameters (covariates of no interest). Per run,  
536 blocks were modeled with a boxcar function which was convolved with a hemodynamic response  
537 function. Afterwards, all runs were combined in a single-subject multi-run GLM analysis contrasting  
538 each individual digit against the baseline. The resulting statistical maps were fed into the  
539 representational similarity analysis (RSA) of BrainVoyager, which served to analyze the (dis)similarity  
540 of activation patterns evoked by individual finger movements in the sensorimotor cortex using the  
541 Pearson correlation method for calculating (dis)similarities. Within each region of interest (see further),  
542 a representational dissimilarity matrix (RDM) was computed between pairs of activation patterns  
543 representing individual finger movements for each hemisphere and participant separately, as well as  
544 across participants. More specifically, for a given brain region, the activation patterns elicited by single

545 finger movements are interpreted as stimulus representations. Next, activation patterns associated by  
546 each pair of conditions (i.e., single finger movements) are compared, resulting in an RDM with each  
547 cell of the RDM reflecting the dissimilarity (i.e., distance) between the activation patterns elicited by  
548 the two single finger movements. As such, the RDM is symmetrical with zeros on the diagonal  
549 (Kriegeskorte, Mur, & Bandettini, 2008). The dissimilarity measure  $d$ , from which the RDM is built,  
550 was transformed back to a correlation/similarity value by performing  $1 - d$ , such that higher values in  
551 the matrix represent more similar spatial activation patterns between single digits. Anatomical regions  
552 of interest (ROIs) were defined by means of FreeSurfer (version 21.0, <http://surfer.nmr.mgh.harvard.edu>). The pial and white-gray matter surfaces of the T1-weighted anatomical image were  
553 reconstructed and used to define Broadmann areas (BA) 1, 2, 3a, 3b, 4a, and 4p, on the group surface.  
554 The BA 1, 2, 3a, and 3b were then merged to form the primary somatosensory cortex (S1), and BA 4a  
555 and 4p were merged to form the primary motor cortex (M1). These ROIs were defined for both  
556 hemispheres. As we were interested in individual finger representations at the level of M1 and S1, we  
557 selected the hand areas in the pre- and post-central gyri based on a combination of fMRI activation and  
558 landmarks (Yousry et al., 1997) and approximately 2 centimeters above and below these regions. Next,  
559 M1 and S1 masks were projected onto resampled native space for each participant making use of their  
560 individual surfaces (per hemisphere). The resulting ROIs were imported into BrainVoyager (v20.6 –  
561 Brain Innovation BV, Maastricht, The Netherlands) to serve as masks to perform the RSA.  
562

### 563 *Statistical analysis*

564 Reaction time data of the CRTT task were analyzed using repeated-measures analysis of variances  
565 (ANOVAs) with Hand (left/right), Coordination mode (unimanual/bimanual) and Digit (D1, D2, D3,  
566 D4, D5) as factors of interest. As accuracy, interference scores and digit enslaving measures of the  
567 CRTT deviated significantly from a normal distribution, non-parametric tests were performed to assess  
568 the effects of Hand (left/right), Coordination mode (unimanual/bimanual) and Digit (D1, D2, D3, D4,  
569 D5) or Digit pair (vectorized; D1-D2, D1-D3, D1-D4, D1-D5, D2-D3, D2-D4, D2-D5, D3-D4, D3-D5,  
570 D4-D5). As matrices including digit enslaving and interference scores were typically not symmetrical,  
571 we compared values above and below the diagonal, revealing no significant main effect ( $p_s > .05$ ). We,  
572 therefore, averaged the values above and below the diagonal and created symmetrized matrices for  
573 further analyses. However, as Wilcoxon Matched Pairs Tests comparing digit pairs directly revealed  
574 some differences between values above and below the diagonal for interference scores in particular  
575 (surviving a Bonferroni correction;  $p < .005$ ), we also performed the analyses for symmetrized data  
576 above and below the diagonal separately. Corresponding findings are reported in the Supplementary  
577 Materials. In order to compare digit enslaving and interference matrices between the left and right hand,  
578 Mantel tests (5000 permutations) were performed for each participant separately, and across  
579 participants. The Mantel test is a statistical test of the correlation between two matrices with the same  
580 dimensions (Mantel, 1967) and can be applied to determine correlations between matching positions of

581 two (dis)similarity matrices resultant from multivariate data. In addition, to determine the extent to  
582 which digit representations in the primary sensorimotor cortices could explain digit enslaving and  
583 interference scores in the contralateral hand during the CRTT, subject-by-subject and group neural  
584 similarity matrices were compared using Mantel tests (5000 permutations). RDMs of the left hemisphere  
585 (M1 and S1) were correlated with enslaving matrices of the right hand, and vice versa. This resulted in  
586 four Mantel tests per participant and across participants.

587 Enslaving data of the FTT (i.e., correlation coefficients) were also analyzed using a repeated-measures  
588 ANOVA with Hand (left/right) and Digit pair (vectorized; D1-D2, D1-D3, D1-D4, D1-D5, D2-D3, D2-  
589 D4, D2-D5, D3-D4, D3-D5, D4-D5) as factors of interest. As digit enslaving matrices were typically  
590 not symmetrical, we compared values above and below the diagonal, revealing no significant main effect  
591 ( $p_s > .05$ ). We, therefore, averaged the values above and below the diagonal and created symmetrized  
592 matrices for further analyses. In order to correlate digit enslaving matrices between the left and right  
593 hand, Mantel tests (5000 permutations) were performed for each participant separately, and across  
594 participants. In addition, to determine the extent to which digit representational structures in the primary  
595 sensorimotor cortices could explain digit enslaving in the contralateral hand during the FTT, subject-  
596 by-subject and group similarity matrices were compared using Mantel tests (5000 permutations). As the  
597 type of co-activation (i.e., co-contraction (decrease of force on the sensor) or supporting movement  
598 (increase of force on the sensor)) is not of relevance when associating with cortical representations,  
599 absolute correlation coefficients were used in the following analyses. RDMs of the left hemisphere (M1  
600 and S1) were correlated with enslaving matrices of the right hand, and vice versa. This resulted in four  
601 Mantel tests per participant, and across participants. In the results section, correlation coefficients using  
602 Spearman's rank correlation are given along with corresponding  $p$  values. All Mantel tests were carried  
603 out in the R environment using the vegan package (Oksanen, 2012).

604

## 605 **Acknowledgments**

606 This work was supported by the Research Fund KU Leuven (C16/15/070), Fonds Wetenschappelijk  
607 Onderzoek Vlaanderen (FWO) (G089818N) and by the FWO-FNRS Excellence of Science Grant (EOS  
608 30446199, MEMODYN). JG and SC are funded by an FWO postdoctoral fellowship. The funders had  
609 no role in study design, data collection and analysis, decision to publish, or preparation of the  
610 manuscript. The authors would like to thank R. Clerckx for support on the behavioral analysis and J.  
611 Diedrichsen and N. Ejaz for support on the non-ferromagnetic experimental setup.

612

## 613 **Declaration of interest**

614 The authors declare no competing interests.

615 **References**

- 616 Ariani, G., Oosterhof, N. N., & Lingnau, A. (2018). Time-resolved decoding of planned delayed and  
617 immediate prehension movements. *Cortex*, *99*, 330-345. doi:10.1016/j.cortex.2017.12.007
- 618 Ariani, G., Pruszynski, J. A., & Diedrichsen, J. (2021). Motor planning brings human primary  
619 somatosensory cortex in action-specific preparatory states. *BioRxiv*.
- 620 Bailey, J., & Penhune, V. B. (2012). A sensitive period for musical training: contributions of age of onset  
621 and cognitive abilities. *Ann N Y Acad Sci*, *1252*, 163-170. doi:10.1111/j.1749-  
622 6632.2011.06434.x
- 623 Bailey, J. A., & Penhune, V. B. (2010). Rhythm synchronization performance and auditory working  
624 memory in early- and late-trained musicians. *Exp Brain Res*, *204*(1), 91-101.  
625 doi:10.1007/s00221-010-2299-y
- 626 Beck, S., & Hallett, M. (2010). Surround inhibition is modulated by task difficulty. *Clin Neurophysiol*,  
627 *121*(1), 98-103. doi:10.1016/j.clinph.2009.09.010
- 628 Beck, S., & Hallett, M. (2011). Surround inhibition in the motor system. *Exp Brain Res*, *210*(2), 165-172.  
629 doi:10.1007/s00221-011-2610-6
- 630 Beisteiner, R., Windischberger, C., Lanzenberger, R., Edward, V., Cunnington, R., Erdler, M., . . . Deecke,  
631 L. (2001). Finger somatotopy in human motor cortex. *Neuroimage*, *13*(6 Pt 1), 1016-1026.  
632 doi:10.1006/nimg.2000.0737
- 633 Breman, H., Mulders, J., Fritz, L., Peters, J., Pyles, J., Eck, J., . . . Goebel, R. (2020). *An image registration-*  
634 *based method for EPI distortion correction based on opposite phase encoding (COPE)*.
- 635 Bundy, D. T., & Leuthardt, E. C. (2019). The Cortical Physiology of Ipsilateral Limb Movements. *Trends*  
636 *Neurosci*, *42*(11), 825-839. doi:10.1016/j.tins.2019.08.008
- 637 Catani, M., Dell'acqua, F., Vergani, F., Malik, F., Hodge, H., Roy, P., . . . Thiebaut de Schotten, M. (2012).  
638 Short frontal lobe connections of the human brain. *Cortex*, *48*(2), 273-291.  
639 doi:10.1016/j.cortex.2011.12.001
- 640 Chettouf, S., Rueda-Delgado, L. M., de Vries, R., Ritter, P., & Daffertshofer, A. (2020). Are unimanual  
641 movements bilateral? *Neurosci Biobehav Rev*, *113*, 39-50.  
642 doi:10.1016/j.neubiorev.2020.03.002
- 643 Crammond, D. J., & Kalaska, J. F. (2000). Prior information in motor and premotor cortex: activity  
644 during the delay period and effect on pre-movement activity. *J Neurophysiol*, *84*(2), 986-1005.  
645 doi:10.1152/jn.2000.84.2.986
- 646 Ejaz, N., Hamada, M., & Diedrichsen, J. (2015). Hand use predicts the structure of representations in  
647 sensorimotor cortex. *Nat Neurosci*, *18*(7), 1034-1040. doi:10.1038/nn.4038
- 648 Gale, D. J., Flanagan, J. R., & Gallivan, J. P. (2021). Human somatosensory cortex is modulated during  
649 motor planning. *Journal of Neuroscience*.
- 650 Gooijers, J., & Swinnen, S. P. (2014). Interactions between brain structure and behavior: the corpus  
651 callosum and bimanual coordination. *Neurosci Biobehav Rev*, *43*, 1-19.  
652 doi:10.1016/j.neubiorev.2014.03.008
- 653 Guevara, P., Poupon, C., Riviere, D., Cointepas, Y., Descoteaux, M., Thirion, B., & Mangin, J. F. (2011).  
654 Robust clustering of massive tractography datasets. *Neuroimage*, *54*(3), 1975-1993.  
655 doi:10.1016/j.neuroimage.2010.10.028
- 656 Hager-Ross, C., & Schieber, M. H. (2000). Quantifying the independence of human finger movements:  
657 comparisons of digits, hands, and movement frequencies. *J Neurosci*, *20*(22), 8542-8550.  
658 Retrieved from <https://www.ncbi.nlm.nih.gov/pubmed/11069962>
- 659 Hirose, S., Nambu, I., & Naito, E. (2018). Cortical activation associated with motor preparation can be  
660 used to predict the freely chosen effector of an upcoming movement and reflects response  
661 time: An fMRI decoding study. *Neuroimage*, *183*, 584-596.  
662 doi:10.1016/j.neuroimage.2018.08.060
- 663 Hlustik, P., Solodkin, A., Gullapalli, R. P., Noll, D. C., & Small, S. L. (2001). Somatotopy in human primary  
664 motor and somatosensory hand representations revisited. *Cereb Cortex*, *11*(4), 312-321.  
665 doi:10.1093/cercor/11.4.312

- 666 Huber, L., Finn, E. S., Handwerker, D. A., Bonstrup, M., Glen, D. R., Kashyap, S., . . . Bandettini, P. A.  
667 (2020). Sub-millimeter fMRI reveals multiple topographical digit representations that form  
668 action maps in human motor cortex. *Neuroimage*, 208, 116463.  
669 doi:10.1016/j.neuroimage.2019.116463
- 670 Indovina, I., & Sanes, J. N. (2001). On somatotopic representation centers for finger movements in  
671 human primary motor cortex and supplementary motor area. *Neuroimage*, 13(6 Pt 1), 1027-  
672 1034. doi:10.1006/nimg.2001.0776
- 673 Kimura, D., & Vanderwolf, C. H. (1970). The relation between hand preference and the performance  
674 of individual finger movements by left and right hands. *Brain*, 93(4), 769-774.  
675 doi:10.1093/brain/93.4.769
- 676 Kleinschmidt, A., Nitschke, M. F., & Frahm, J. (1997). Somatotopy in the human motor cortex hand  
677 area. A high-resolution functional MRI study. *Eur J Neurosci*, 9(10), 2178-2186.  
678 doi:10.1111/j.1460-9568.1997.tb01384.x
- 679 Kolasinski, J., Makin, T. R., Jbabdi, S., Clare, S., Stagg, C. J., & Johansen-Berg, H. (2016). Investigating  
680 the Stability of Fine-Grain Digit Somatotopy in Individual Human Participants. *J Neurosci*, 36(4),  
681 1113-1127. doi:10.1523/JNEUROSCI.1742-15.2016
- 682 Kriegeskorte, N., Mur, M., & Bandettini, P. (2008). Representational similarity analysis - connecting the  
683 branches of systems neuroscience. *Front Syst Neurosci*, 2, 4. doi:10.3389/neuro.06.004.2008
- 684 Lang, C. E., & Schieber, M. H. (2004). Human finger independence: limitations due to passive  
685 mechanical coupling versus active neuromuscular control. *J Neurophysiol*, 92(5), 2802-2810.  
686 doi:10.1152/jn.00480.2004
- 687 Li, S., Danion, F., Latash, M., Li, Z., & Zatsiorsky, V. (2000a). Characteristics of finger force production  
688 during one- and two-hand tasks. *Human Movement Sciences*, 19, 897-923.
- 689 Li, S., Danion, F., Latash, M., Li, Z., & Zatsiorsky, V. (2000b). Finger coordination and bilateral deficit  
690 during two-hand force production tasks performed by right-handed subjects. *Journal of*  
691 *Applied Biomechanics*, 16, 379-391.
- 692 Lotze, M., Erb, M., Flor, H., Huelsmann, E., Godde, B., & Grodd, W. (2000). fMRI evaluation of  
693 somatotopic representation in human primary motor cortex. *Neuroimage*, 11(5 Pt 1), 473-481.  
694 doi:10.1006/nimg.2000.0556
- 695 Mantel, N. (1967). The detection of disease clustering and a generalized regression approach. *Cancer*  
696 *Res*, 27(2), 209-220. Retrieved from <https://www.ncbi.nlm.nih.gov/pubmed/6018555>
- 697 Martuzzi, R., van der Zwaag, W., Farthouat, J., Gruetter, R., & Blanke, O. (2014). Human finger  
698 somatotopy in areas 3b, 1, and 2: a 7T fMRI study using a natural stimulus. *Hum Brain Mapp*,  
699 35(1), 213-226. doi:10.1002/hbm.22172
- 700 Oksanen, J., Blanchet, J.G., Kindt, R., Legendre, P., Minchin, P.R., O'Hara, R.B., Simpson, G.L., Solymos,  
701 P., Stevens, M.H.h., Wagner, H. (2012). Vegan: Community Ecology Package. In *R Package*  
702 *version 2.0-5*.
- 703 Oldfield, R. C. (1971). The assessment and analysis of handedness: the Edinburgh inventory.  
704 *Neuropsychologia*, 9(1), 97-113. doi:10.1016/0028-3932(71)90067-4
- 705 Olman, C. A., Pickett, K. A., Schallmo, M. P., & Kimberley, T. J. (2012). Selective BOLD responses to  
706 individual finger movement measured with fMRI at 3T. *Hum Brain Mapp*, 33(7), 1594-1606.  
707 doi:10.1002/hbm.21310
- 708 Prigatano, G. P., de Oliveira, S. B., Goncalves, C. W. P., Denucci, S. M., Pereira, R. M., & Braga, L. W.  
709 (2020). Inhibitory Control of Adjacent Finger Movements while Performing a Modified Version  
710 of the Halstead Finger Tapping Test: Effects of Age, Education and Sex. *J Int Neuropsychol Soc*,  
711 1-12. doi:10.1017/S1355617720001101
- 712 Reilly, K. T., & Hammond, G. R. (2004). Human handedness: is there a difference in the independence  
713 of the digits on the preferred and non-preferred hands? *Exp Brain Res*, 156(2), 255-262.  
714 doi:10.1007/s00221-003-1783-z
- 715 Sanchez-Panchuelo, R. M., Besle, J., Beckett, A., Bowtell, R., Schluppeck, D., & Francis, S. (2012). Within-  
716 digit functional parcellation of Brodmann areas of the human primary somatosensory cortex



- 717 using functional magnetic resonance imaging at 7 tesla. *J Neurosci*, 32(45), 15815-15822.  
718 doi:10.1523/JNEUROSCI.2501-12.2012
- 719 Sanchez Panchuelo, R. M., Besle, J., Schluppeck, D., Humberstone, M., & Francis, S. (2018). Somatotopy  
720 in the Human Somatosensory System. *Front Hum Neurosci*, 12, 235.  
721 doi:10.3389/fnhum.2018.00235
- 722 Sanes, J. N., Donoghue, J. P., Thangaraj, V., Edelman, R. R., & Warach, S. (1995). Shared neural  
723 substrates controlling hand movements in human motor cortex. *Science*, 268(5218), 1775-  
724 1777. doi:10.1126/science.7792606
- 725 Schellekens, W., Petridou, N., & Ramsey, N. F. (2018). Detailed somatotopy in primary motor and  
726 somatosensory cortex revealed by Gaussian population receptive fields. *Neuroimage*, 179,  
727 337-347. doi:10.1016/j.neuroimage.2018.06.062
- 728 Schieber, M. H. (2002). Motor cortex and the distributed anatomy of finger movements. *Adv Exp Med*  
729 *Biol*, 508, 411-416. doi:10.1007/978-1-4615-0713-0\_46
- 730 Shin, H. W., Sohn, Y. H., & Hallett, M. (2009). Hemispheric asymmetry of surround inhibition in the  
731 human motor system. *Clin Neurophysiol*, 120(4), 816-819. doi:10.1016/j.clinph.2009.02.004
- 732 Shinoura, N., Suzuki, Y., Yamada, R., Kodama, T., Takahashi, M., & Yagi, K. (2005). Fibers connecting the  
733 primary motor and sensory areas play a role in grasp stability of the hand. *Neuroimage*, 25(3),  
734 936-941. doi:10.1016/j.neuroimage.2004.12.060
- 735 Siero, J. C., Hermes, D., Hoogduin, H., Luijten, P. R., Ramsey, N. F., & Petridou, N. (2014). BOLD matches  
736 neuronal activity at the mm scale: a combined 7T fMRI and ECoG study in human sensorimotor  
737 cortex. *Neuroimage*, 101, 177-184. doi:10.1016/j.neuroimage.2014.07.002
- 738 Swinnen, S. P., & Wenderoth, N. (2004). Two hands, one brain: cognitive neuroscience of bimanual  
739 skill. *Trends Cogn Sci*, 8(1), 18-25. doi:10.1016/j.tics.2003.10.017
- 740 Tanji, J., & Evarts, E. V. (1976). Anticipatory activity of motor cortex neurons in relation to direction of  
741 an intended movement. *J Neurophysiol*, 39(5), 1062-1068. doi:10.1152/jn.1976.39.5.1062
- 742 Van Helvert, M. J. L., Oostwoud-Wijdenes, L., Geerligs, L., & Medendorp, P. (2021). Beta-band  
743 desynchronization reflects uncertainty in effector selection during motor planning. *BioRxiv*.
- 744 Wilhelm, L. A., Martin, J. R., Latash, M. L., & Zatsiorsky, V. M. (2014). Finger enslaving in the dominant  
745 and non-dominant hand. *Hum Mov Sci*, 33, 185-193. doi:10.1016/j.humov.2013.10.001
- 746 Yousry, T. A., Schmid, U. D., Alkadhi, H., Schmidt, D., Peraud, A., Buettner, A., & Winkler, P. (1997).  
747 Localization of the motor hand area to a knob on the precentral gyrus. A new landmark. *brain*,  
748 120 ( Pt 1), 141-157. doi:10.1093/brain/120.1.141
- 749 Yu, W. S., van Duinen, H., & Gandevia, S. C. (2010). Limits to the control of the human thumb and  
750 fingers in flexion and extension. *J Neurophysiol*, 103(1), 278-289. doi:10.1152/jn.00797.2009
- 751 Zatsiorsky, V. M., Li, Z. M., & Latash, M. L. (2000). Enslaving effects in multi-finger force production.  
752 *Exp Brain Res*, 131(2), 187-195. doi:10.1007/s002219900261

753

754
